# Supplementary material for: Transcriptome Profile of the Asian Giant Hornet (Vespa mandarinia) Using Illumina HiSeq 4000 Sequencing: De Novo Assembly, Functional Annotation, and Discovery of SSR Markers
Source: PubMed Central journal article supplement (PMC4736913; doi:10.1155/2016/4169587), 2016-01-10
Supplement: 4169587.f1.pdf [file 4169587.f1.pdf]

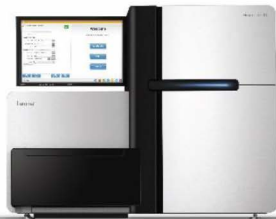

Illumina HiSeq 4000 reads  
(100-150 bp)

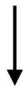

Data Processing  
(thinning, trimming, adapter removal)

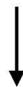

*De novo* Assembly  
(Trinity)

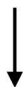

Contig sequences

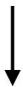

TGICL Clustering

Unigene sequences

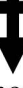

BLASTX

Sequence annotation

PANM-DB, Unigene DB, KOG DB

Functional annotation  
(GO, KEGG, InterPro domain)

cSSR analysis

**A**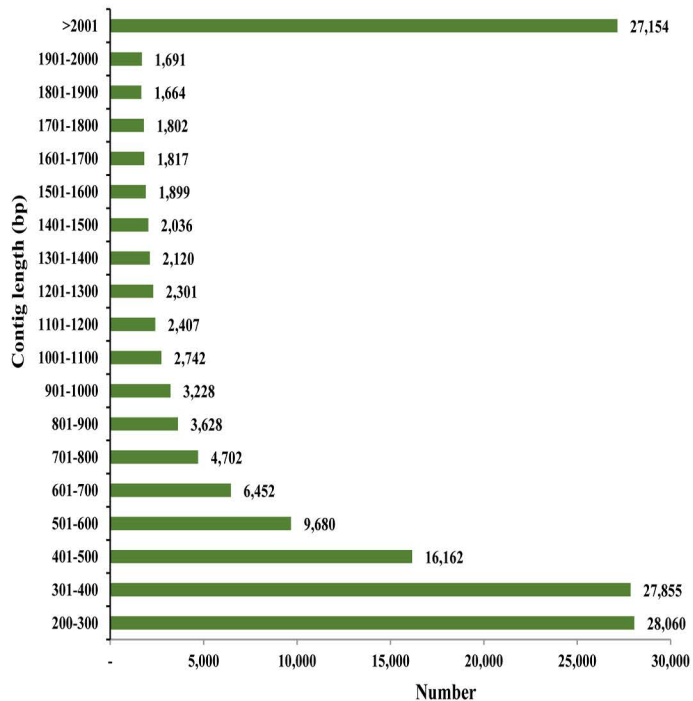**B**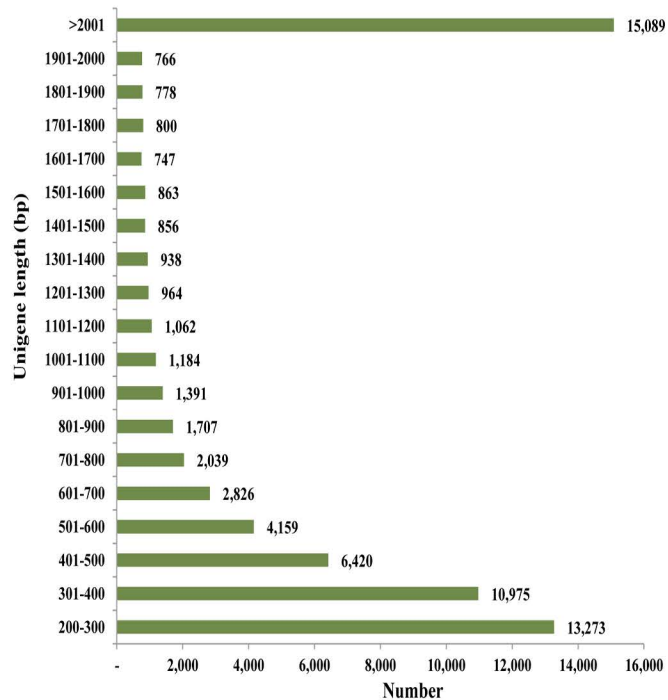

### Supplementary Table 1.

Summary of raw read processing and assembly parameters after Illumina HiSeq 4000 sequencing of *V. mandarinia*. Cutadapt program was used for the thinning and trimming analyses.

| Data Processing Parameters         | Read values   |
|------------------------------------|---------------|
| Total number of raw reads          |               |
| - Number of sequences              | 60,723,154    |
| - Number of bases                  | 9,169,196,254 |
| Total read pairs processed         | 30,361,577    |
| - Read 1 with adapter              | 2,723,248     |
| - Read 2 with adapter              | 2,511,316     |
| Pairs written (passing filters)    | 30,361,577    |
| Total base pairs processed (bp)    | 9,169,196,254 |
| - Read 1 (bp)                      | 4,584,598,127 |
| - Read 2 (bp)                      | 4,584,598,127 |
| Total written (filtered) (bp)      | 9,002,691,935 |
| - Read 1 (bp)                      | 4,498,204,748 |
| - Read 2 (bp)                      | 4,504,487,187 |
| Percent of reads after trimming    | 98.18         |
| Percent of reads discarded         | 1.82          |
| Average length after trimming (bp) | 148.3         |

|                       |                                                                 |
|-----------------------|-----------------------------------------------------------------|
| Adapter 1<br>sequence | AGATCGGAAGAGCACACGTCTGAACTCCAGTCAC                              |
| Adapter 2<br>sequence | AGATCGGAAGAGCGTCGTGTAGGGAAAGAGTGTAGATCTCGGTGGTCCG<br>CCGTATCATT |

**Supplementary Table 2.**Summary of SSR search in the unigenes of *V. mandarinia*

| <b>Searching item</b>                          | <b>Numbers</b>        |
|------------------------------------------------|-----------------------|
| Total number of sequences examined             | 66837                 |
| Total size of examined sequences (bp)          | 95657681              |
| Total number of identified SSRs                | 534922                |
| Number of SSR containing sequences             | 62522                 |
| Number of sequences containing more than 1 SSR | 56378                 |
| Number of SSRs present in compound formation   | 275493                |
|                                                |                       |
| <b>Unit size</b>                               | <b>Number of SSRs</b> |
| 1                                              | 29670                 |
| 2                                              | 370450                |
| 3                                              | 105010                |
| 4                                              | 20182                 |
| 5                                              | 4134                  |
| 6                                              | 4225                  |
| 7                                              | 537                   |
| 8                                              | 566                   |
| 10                                             | 148                   |
| <b>Total</b>                                   | <b>534922</b>         |
